# Supplementary material for: Interrupting Sitting Time in Postmenopausal Women: Protocol for the Rise for Health Randomized Controlled Trial
Source: PubMed Central journal article supplement (PMC8160808; doi:10.2196/28684), 2021-05-13
Supplement: resprot_v10i5e28684_app2.pdf [file resprot_v10i5e28684_app2.pdf]

**SUMMARY STATEMENT**

**PROGRAM CONTACT:**  
**SERGEI ROMASHKAN**  
**(301) 435-3047**  
**romashks@nia.nih.gov**

**( Privileged Communication )**

**Release Date:** 12/09/2016  
**Revised Date:**

---

**Application Number:** 1 P01 AG052352-01A1

**Principal Investigators (Listed Alphabetically):**

**KERR, JACQUELINE**  
**LACROIX, ANDREA Z. (Contact)**

**Applicant Organization: UNIVERSITY OF CALIFORNIA SAN DIEGO**

**Review Group:** ZAG1 ZIJ-7 (J1)  
National Institute on Aging Special Emphasis Panel  
Second Stage P01 Review

**Meeting Date:** 11/21/2016  
**Council:** JAN 2017  
**Requested Start:** 04/01/2017

**RFA/PA:** PAR13-258  
**PCC:** 4CCTSSR

---

**Project Title:** Sedentary Behaviour Interrupted: Acute, medium and long-term effects on biomarkers of healthy aging, physical function and mortality

**SRG Action:** Impact Score:20

**Next Steps:** Visit [http://grants.nih.gov/grants/next\\_steps.htm](http://grants.nih.gov/grants/next_steps.htm)

**Human Subjects:** 30-Human subjects involved - Certified, no SRG concerns

**Animal Subjects:** 10-No live vertebrate animals involved for competing appl.

**Gender:** 2A-Only women, scientifically acceptable

**Minority:** 1A-Minorities and non-minorities, scientifically acceptable

**Children:** 3A-No children included, scientifically acceptable  
Clinical Research - not NIH-defined Phase III Trial

---

| <b>Project Year</b> | <b>Direct Costs Requested</b> | <b>Estimated Total Cost</b> |
|---------------------|-------------------------------|-----------------------------|
| 1                   | 1,499,411                     | 2,328,592                   |
| 2                   | 1,499,350                     | 2,328,498                   |
| 3                   | 1,499,882                     | 2,329,324                   |
| 4                   | 1,499,826                     | 2,329,237                   |
| 5                   | 1,499,645                     | 2,328,956                   |
| <b>TOTAL</b>        | <b>7,498,114</b>              | <b>11,644,606</b>           |

---

**ADMINISTRATIVE BUDGET NOTE:** The budget shown is the requested budget and has not been adjusted to reflect any recommendations made by reviewers. If an award is planned, the costs will be calculated by Institute grants management staff based on the recommendations outlined below in the COMMITTEE BUDGET RECOMMENDATIONS section.

**PROJECT 2: SEDENTARY BEHAVIOR INTERRUPTED: A RANDOMIZED TRIAL OF 3-MONTH EFFECTS OF BIOMARKERS OF HEALTHY AGING AND PHYSICAL FUNCTIONING IN THE REAL WORLD; Dr. Jacqueline Kerr, Project Leader (PL)**

**DESCRIPTION (provided by applicant):** Project 2 of the Sedentary Time and Aging Research (STAR) Program will investigate how 3 month changes in standing time, brief sit-to-stand transitions and physical activity (PA) breaks, will impact biomarkers of healthy aging, and physical, emotional and cognitive functioning compared to healthy living attention controls. This 4-arm randomized controlled trial (RCT) will occur in the 'real world' with postmenopausal women (N=592) who are not physically active, do not stand up frequently and spend at least 8 hours sitting per day, i.e. most older adults. The daily behavior targets in each condition of Project 2 (increase standing by 2 hours, increase sit-to-stand transitions by 30 per day, & increase PA breaks by 12) reflect the treatment conditions explored in Project 1. To date, there have been no RCT studies with health outcomes in older adults. Our multiple pilot studies, however, demonstrate the feasibility and acceptability of delivering intervention materials (including standing desks, trackers & ActivPAL feedback) to older adults and evaluating behavior change objectively with thigh-worn inclinometers. The interventions significantly reduced sitting time (up to 2 hours a day) and significantly increased sit-to-stand transitions (up to 40 per day). Increases in PA were minimal in the standing conditions, compared to our PA focused RCT in 307 older adults which increased short PA bouts. One pre-post pilot found that reductions in sitting time were significantly related to improved gait speed and decreased depressive symptoms. Project 2 will assess the impact of the 3 interventions to interrupt sitting compared to the attention control condition at 6 and 12 weeks. We will recruit 592 overweight, sedentary, postmenopausal women who will be randomized to one of the 4 conditions. We will employ tools such as standing desks, wrist-worn device alerts and condition-specific, tailored ActivPAL feedback. The primary outcomes are glucose regulation and blood pressure. Secondary outcomes include mitochondrial functioning (measured by muscle mitochondrial respiratory capacity), and physical, emotional and cognitive functioning. Exploratory outcomes include psychosocial and environmental mediators and moderators of behavior change. We will also explore the moderating effect of age on the intervention outcomes. Project 2 compliments the other projects by assessing 3 month intermediary outcomes. Project 2 will help validate the novel computational algorithms optimized in Project 1 and applied to Project 3. In addition, the Biostatistics Core will investigate the response patterns in Projects 1 and 3 and map them to Project 2. Project 2 will strengthen the public health evidence of how to interrupt sitting time in older adults, provide specific information on interrupting sitting as an alternative to longer PA bouts, and explore a range of targeted outcomes related to healthy aging.

**CRITIQUE 1:**

Significance: 2  
Investigator(s): 1  
Innovation: 1  
Approach: 4  
Environment: 1

**Overall Impact:**

This updated and revised Project 2 application aims to compare three interventions (increased standing, increased sit-to-stand transitions, and increased PA bouts) to disrupt sitting with a control group on markers of glucose regulation and blood pressure. As secondary aims, the investigators will assess whether these interventions impact muscle mitochondrial capacity; physical, emotional and cognitive outcomes. Finally, the effect of age, psychosocial and environmental factors on these relationships will be examined and the outcomes will be compared between interventions. This is an application from an experienced investigative team with a successful record of publications and funding

in the area of physical activity and sedentary behavior. The PL, Co-Is and consultants are all well positioned to successfully complete this project and disseminate the results. The research question within this application has important clinical, scientific and practical significance. The investigators were responsive to the previous review. However, changes to the physical activity intervention and a lack of detailed descriptions of the interventions has diminished the reviewer's enthusiasm for this application.

### **1. Significance:**

#### **Strengths**

- Interventions that focus on interrupting or decreasing time spent in sedentary behaviors in this population may show a clinical benefit.
- The population of focus in this application would likely benefit greatly from reductions in sitting and increases in movement.
- Comparing changes in behaviors and biomarkers in response to interventions that aim to reduce sitting, increase disruptions to sedentary behavior, and increase physical activity will be highly informative to future interventions.
- Few studies have examined the impact of disrupting sitting time outside of the laboratory, therefore the results of this project will provide information on the efficacy of these interventions as well as on the outcomes listed.

#### **Weaknesses**

- The PA intervention changed from increasing PA by 30 min/day to taking 12 extra 2-5 min PA breaks per day. This is still a break to (potentially) sedentary behavior and may not be distinct enough from the other intervention conditions.

### **2. Investigator(s):**

#### **Strengths**

- The PL is a mid-career investigator with a strong publication and funding history in this area of inquiry.
- The team has successfully worked together in the past and continue to work together on other projects.
- There appears to be sufficient and qualified personnel to carry out the research project (Health Educator, Project Coordinator, Recruiter, etc.).

#### **Weaknesses**

- None noted.

### **3. Innovation:**

#### **Strengths**

- This Project will be the first RCT to examine and compare the effects of three interventions to disrupt and/or reduce sedentary behavior in post-menopausal women.
- There is a lack of RCTs examining interruptions to sitting.
- This project will be the first to examine the impact of using standing desks outside of the workplace or school to reduce sitting behavior.
- This project will compare three interventions to disrupt sitting- one with standing, one with increased sit-to-stand transitions, and one with physical activity.
- Comparing the effect of these interventions on muscle mitochondrial function is novel.

#### **Weaknesses**

- None noted.

### **4. Approach:**

#### **Strengths**

- The use of valid and reliable measures of SB and PA is a strength.

- The application of RCT is a strong design, with a strong rationale supporting separation of standing and sit-to-stand transitions as separate interventions. This design and the outcome of this study will give researchers and clinicians an indication the effectiveness of sitting interruption interventions. Further, comparing 2 sedentary interventions to a PA group and a control group may allow the investigators to answer many questions about the efficacy of the standing interventions vs. PA interventions, pending distinctness of the interventions.
- The researchers have tried to isolate each intervention behavior – standing, transitions from sitting to standing, and PA.
- The use of the CTRI, the new AHA Center, and the numerous other Center connections will strengthen the application.
- The control group intervention is strong, with a clear indication of information that will be delivered.
- The inclusion/exclusion criteria pertaining to sitting, sit-to-stand transitions and physical activity are strong and will result in a study population that is highly likely to benefit from the intervention.
- The screening process is well described and thorough.

#### **Weaknesses**

- The descriptions of the interventions are lacking. It is not clear what will be asked of the participants in the intervention arms. Are the participants given suggestions on what to do to once they stand up? Will they be restricted to standing only? What types of PA will be recommended? Further, is it not clear how distinct the interventions will be from each other, once the participants start carrying out the interventions. The potential overlap in the interventions will result in an inability to decipher the unique effects on the outcomes of interest.
- The rationale for the 2-5 min PA breaks is not clear. This PA recommendation is not in line with the PA recommendations.
- The dose of activity in each of these interventions is not equated, which will make it difficult to compare the outcome to standing, sit-to-stand transitions, to PA.
- The validation of machine learning algorithms is not well integrated into the application.

#### **5. Environment:**

##### **Strengths**

- The University, the CTRI, and the Centers are well- equipped and supportive of the successful completion of this application.
- Outstanding.

##### **Weaknesses**

- None noted.

#### **Protections for Human Subjects:**

Acceptable risks and adequate protections.

#### **Data and Safety Monitoring Plan:**

Acceptable.

- While a DSMP is not needed, it provides an additional layer of protection for the research participants.

#### **Inclusion of Women, Minorities and Children:**

- Sex/Gender: Distribution justified scientifically.
- Race/Ethnicity: Distribution justified scientifically.
- For NIH-Defined Phase III trials, Plans for valid design and analysis: Not applicable.
- Inclusion/Exclusion of Children under 18: Excluding ages <18; justified scientifically.

- The inclusion of women only is justified in the application.

**Resubmission:**

- The investigators address most of the comments provided by the reviewers. However, one arm of the intervention was changed from a 30-minute PA intervention to 12, 2-5 minute PA breaks. The reviewer is not convinced this will be distinct enough from the sit-to-stand intervention.
- The interventions are not well described. It is not clear what the participants will be told to do in each of the interventions. For instance, if they stand up, can they move to go get a drink of water?
- With the removal of the biomarkers core, there were 4 additional personnel added to this Project, which will strengthen the quality and dissemination of the project.

**Budget and Period of Support:**

Recommend as Requested.

**CRITIQUE 2:**

Significance: 1

Investigator(s): 1

Innovation: 2

Approach: 5

Environment: 1

**1. Significance:**

**Strengths**

- Sedentary behavior is important risk factor for older adults and there is a need to understand lifestyle approaches to avert these effects.
- Results have the potential to inform lifestyle approaches to reduce negative health effects of sedentary behavior.

**Weakness**

- None noted.

**2. Investigators:**

**Strengths**

- The investigative team is outstanding and well qualified to conduct the proposed trial.

**Weakness**

- None noted.

**3. Innovation:**

**Strengths**

- This will be the first RCT to focus on changing sedentary behavior in overweight postmenopausal women.
- Multiple approaches will be assessed.
- Concurrent measures of glycemic control and endothelial function outcomes.

**Weaknesses**

- Although post-menopausal women have not been studied before in a randomized trial, it is not abundantly clear why other older adults at risk are not included.

**4. Approach:**

**Strengths**

- Use of mobile tools to track sitting interruptions in real time and also summarized at the daily/weekly level.
- Feasibility supported by large-scale pilot trials.

**Weaknesses**

- The rationale for the PA condition is confusing. It is stated that the 2-5 min breaks were selected to be in line with the PA guidelines. However, the PA guidelines are focused on accumulation of moderate intensity activity in bouts of 10 min or more. Thus, the investigators related to the accumulation of moderate to vigorous intensity activity of 30 min over the course of a day. However, the bouts are referred to a "light" PA bouts which would not be consistent or related to PA guidelines. The intensity of the PA breaks is not described. If light intensity, then the recommended PA breaks are not consistent with current PA guidelines.
- Given that the total amount of time that participants take break from sedentary behavior vary across conditions, the findings of the proposed study may be difficult to interpret since it would not be clear if changes were due to a dose effect or type of activity effect.
- Power is limited to detect differences across intervention conditions. This is a significant weakness given the potential importance of this question for health recommendations for older adults.

**5. Environment:**

**Strengths:**

- The Environment to conduct the planned study is outstanding.

**Weaknesses**

- None noted.

**Protections for Human Subjects:**

Acceptable Risks and/or Adequate Protections.

- No concerns.

**Data and Safety Monitoring Plan:**

- Acceptable.

**Inclusion of Women, Minorities and Children:**

- Sex/Gender: Distribution justified scientifically.
- Race/Ethnicity: Distribution justified scientifically.
- For NIH-Defined Phase III trials, Plans for valid design and analysis: Not applicable.
- Inclusion/Exclusion of Children under 18: Excluding ages <18; justified scientifically.

**Vertebrate Animals:**

Not Applicable (No Vertebrate Animals).

**Resubmission:**

- Investigators were very responsive to recommendations from previous submission.

**Budget and Period of Support:**

Recommend as Requested.

**CRITIQUE 3:**

Significance: 2

Investigator(s): 1

Innovation: 1

Approach: 2  
Environment: 1

**Overall Impact:**

The outcomes of this Project, if achieved, have important clinical and practical significance to the field of health promotion and PA. This is a well-written application from experienced team who have demonstrated by previous work that they are likely to achieve this ambitious project. Project 2 is innovative, comparing 3 interventions to attention/education controls. This Project will have multiple outcomes, from those demonstrating mechanisms of improvement in health from objective measures (NIRS, glucose regulation, BP) to self-reported physical, psychosocial, cognitive, and other exploratory outcomes. Enthusiasm for this project is high and is likely to have a substantial impact on the science of SB and PA and how they may improve health. Weaknesses are focused primarily on the approach. Main concerns include attrition of subjects, overlap of the conditions of the 3 arms, compliance with the intervention conditions by subjects.

**1. Significance:**

**Strengths**

- Developing effective interventions for older women, other than PA, that will improve health (glucose regulation, BP, etc.) is important to improve methods for lifestyle counseling.
- There is a need to study older adults who frequently have metabolic impairments and who could likely show maximal benefit from interrupting SB especially since many older adults do not regularly exercise due to perceived or real barriers.
- Improves scientific evidence of methods of interrupting SB and which method would be superior in terms of important metabolic outcomes.
- If this Project is successful and outcomes achieved, it is likely to have great impact on the field of health promotion & disease prevention.
- Improved rationale for scientific evidence of outcomes

**Weaknesses**

- Not provided.

**2. Investigator(s):**

**Strengths**

- Successful team, demonstrated outcomes, highly qualified to conduct this ambitious program.
- Preliminary data and pilot studies performed provide confidence in ability to complete ambitious project.

**Weaknesses**

- None noted.

**3. Innovation:**

**Strengths**

- Comparing 3 treatment conditions of reducing SB and comparing metabolic outcomes of each group is highly innovative and not accomplished to date.
- Adding mitochondrial measures -NIRS- helps determine mechanisms of action of reducing SB and is innovative.
- Whether emotional and functional outcomes will improve by interrupting SB using different methods is an innovative question, yet particularly salient for older adults.

**Weaknesses**

- Interventions methods/components of changing SB behaviors not highly innovative and may not be pragmatic.

**4. Approach:**

### **Strengths**

- 4 arm comparisons.
- Objective measures and self-reported measures for primary, secondary and exploring mediators and moderators.
- Shorter outcome time in resubmission to test interventions will lesson attrition and improve probability of success.
- Measures of adherence for each condition, important to measure satisfaction with protocol to inform future studies.
- Improved clarity of inclusion/exclusion criteria (and rationale for), measures of PA/SB with both ActivPAL and Actigraph.
- Investigators very responsive to suggestions from previous submission & improved methods.
- Biostatistics support excellent.

### **Weaknesses**

- Intervention components are very ambitious. Not sure if older women will accept the burden of intervention components (many visits to medical center, multiple phone calls, blood draws; packaged dinners, nothing by mouth status); not sure they can accomplish the requirements of each arm, thus limiting variability in outcomes.
- Remained concerned with recruitment and retention of participants and 10% attrition rate is over ambitious (most PA trials at least~20%).
- There is a concern about experimental condition overlap; e.g. standing breaks and brief sit to stand transitions are very similar and subjects may not perform correctly, e.g. PA short breaks may be taken instead of just standing in place.
- Intervention not pragmatic, difficult to enact & would be difficult to replicate in clinical practice because each intervention is testing multiple components that have a menu of choices/different components for each woman to perform. Will each arm be representing the same treatment?
- 20 minute MVPA arm replaced with PA breaks; rational for the latter is lacking, more important to include one arm with the current recommendation (20 min MVPA).
- Motivational interviewing is mentioned as a behavioral strategy in intervention, but components not supported by Table 1, maybe just motivational components and self-efficacy.

### **5. Environment:**

#### **Strengths**

- Superior research environment.

#### **Weaknesses**

- None noted.

### **Protections for Human Subjects:**

Acceptable Risks and/or Adequate Protections.

### **Data and Safety Monitoring Plan:**

Acceptable.

### **Inclusion of Women, Minorities and Children:**

- Sex/Gender: Distribution justified scientifically.
- Race/Ethnicity: Distribution justified scientifically.
- For NIH-Defined Phase III trials, Plans for valid design and analysis: Not applicable.
- Inclusion/Exclusion of Children under 18: Excluding ages <18; justified scientifically.

### **Vertebrate Animals:**

Not Applicable (No Vertebrate Animals).

**PROGRAM PROJECT AGGREGATE ROSTER  
NATIONAL INSTITUTE ON AGING  
January 2017 Council Round**

THE ROSTER INCLUDES MEMBERS FROM MULTIPLE NIA P01 SPECIAL EMPHASIS PANELS OF THIS IRG:

**CHAIRPERSON(S)**

ANDERSON, ROZALYN M., PHD  
ASSOCIATE PROFESSOR  
DEPARTMENT OF MEDICINE  
DIVISION OF GERIATRICS  
UNIVERSITY OF WISCONSIN  
MADISON, WI 53706

ASTHANA, SANJAY, MD  
PROFESSOR AND HEAD  
DEPARTMENT OF GERIATRICS AND  
GERONTOLOGY  
UNIVERSITY OF WISCONSIN SCHOOL OF  
MEDICINE  
MADISON, WI 53705

COX, DONALD C., PHD  
PROFESSOR  
DEPARTMENT OF ECONOMICS  
BOSTON COLLEGE  
CHESTNUT HILL, MA 02467

CRIBBS, DAVID HASTINGS, PHD  
PROFESSOR AND ASSOCIATE DIRECTOR  
DEPARTMENT OF NEUROLOGY  
THE INSTITUTE FOR MEMORY  
IMPAIRMENTS AND NEUROLOGICAL  
DISORDERS  
UNIVERSITY OF CALIFORNIA, IRVINE  
IRVINE, CA 92697

DEKOSKY, STEVEN T., MD  
PROFESSOR OF NEUROLOGY  
INTEREIM EXECUTIVE DIRECTOR  
MCKNIGHT BRAIN INSTITUTE  
UNIVERSITY OF FLORIDA  
GAINESVILLE, FL 32610

DOW, WILLIAM HATFIELD, PHD  
HENRY J. KAISER PROFESSOR AND  
DIRECTOR  
CENTER ON THE ECONOMICS AND  
DEMOGRAPHY OF AGING  
SCHOOL OF PUBLIC HEALTH  
UNIVERSITY OF CALIFORNIA, BERKELEY  
BERKELEY, CA 94720

HO, VIVIAN, PHD  
PROFESSOR  
DEPARTMENT OF ECONOMICS  
JAMES A. BAKER III INSTITUTE CHAIR IN  
HEALTH ECONOMICS  
INSTITUTE FOR PUBLIC POLICY  
RICE UNIVERSITY  
HOUSTON, TX 77251

KOHL, HAROLD WILLIS, PHD  
PROFESSOR  
DEPARTMENT OF KINESIOLOGY AND  
HEALTH EDUCATION  
UNIVERSITY OF TEXAS AT AUSTIN  
AUSTIN, TX 78701

LANE, JULIA INGRID, PHD  
SENIOR MANAGING ECONOMIST  
AMERICAN INSTITUTES FOR RESEARCH  
WASHINGTON, DC 20007

LOESER, RICHARD F., MD  
PROFESSOR  
DIVISION OF RHEUMATOLOGY  
THURSTON ARTHRITIS RESEARCH  
CENTER  
UNIVERSITY OF NORTH CAROLINA  
CHAPEL HILL, NC 27599

RECANZONE, GREGG HOWARD, PHD

PROFESSOR  
SECTION OF NEUROBIOLOGY,  
PHYSIOLOGY AND BEHAVIOR CENTER FOR  
NEUROSCIENCE  
UNIVERSITY OF CALIFORNIA, DAVIS  
DAVIS, CA 95618

ROBBINS, PAUL D., PHD  
PROFESSOR  
DEPARTMENT OF METABOLISM AND AGING  
THE SCRIPPS RESEARCH INSTITUTE  
JUPITER, FL 33458

TATAR, MARC, PHD  
PROFESSOR  
DEPARTMENT OF ECOLOGY AND  
EVOLUTIONARY BIOLOGY  
BROWN UNIVERSITY  
PROVIDENCE, RI 02912

VIJG, JAN, PHD  
PROFESSOR  
DEPARTMENT OF GENETICS  
ALBERT EINSTEIN COLLEGE OF MEDICINE  
BRONX, NY 10461

WOLOZIN, BENJAMIN L., PHD, MD  
PROFESSOR  
DEPARTMENTS OF PHARMACOLOGY AND  
NEUROLOGY  
BOSTON UNIVERSITY SCHOOL OF  
MEDICINE  
BOSTON, MA 02118

ZAIDI, MONE, MBBS, PHD, MD  
DIRECTOR  
DIVISION OF ENDOCRINOLOGY  
MOUNT SINAI SCHOOL OF MEDICINE  
NEW YORK, NY 10029

### **MEMBERS**

AGARWAL, SUDHA, PHD  
PROFESSOR  
DEPARTMENT OF ORTHOPEDICS  
COLLEGE OF MEDICINE  
OHIO STATE UNIVERSITY  
COLUMBUS, OH 43210

ANDEL, ROSS, PHD  
ASSOCIATE PROFESSOR  
UNIVERSITY OF SOUTH FLORIDA

SCHOOL OF AGING STUDIES  
TAMPA, FL 33620

ANTON, STEPHEN D., PHD  
ASSOCIATE PROFESSOR  
AGING AND GERIATRIC RESEARCH  
UNIVERSITY OF FLORIDA  
GAINESVILLE, FL 32611

ARANCIO, OTTAVIO, PHD, MD  
ASSOCIATE PROFESSOR  
DEPARTMENT OF PATHOLOGY  
AND CELL BIOLOGY  
COLUMBIA UNIVERSITY MEDICAL CENTER  
NEW YORK, NY 10032

ARBEEV, KONSTANTIN G., PHD  
DEPARTMENT OF SOCIOLOGY  
DUKE UNIVERSITY  
DURHAM, NC 27708

BANNASCH, DANIKA L., PHD, DVM  
MAXINE ADLER ENDOWED CHAIR  
DEPARTMENT OF POPULATION HEALTH  
AND REPRODUCTION  
SCHOOL OF VETERINARY MEDICINE  
UNIVERSITY OF CALIFORNIA DAVIS  
DAVIS, CA 95616

BARGER, STEVEN W., PHD  
PROFESSOR  
REYNOLDS INSTITUTE ON AGING  
UNIVERSITY OF ARKANSAS FOR MEDICAL  
SCIENCES  
LITTLE ROCK, AR 72205

BATTERMAN, STUART A., PHD  
PROFESSOR  
DEPARTMENT OF ENVIRONMENTAL  
HEALTH SCIENCES  
SCHOOL OF PUBLIC HEALTH  
UNIVERSITY OF MICHIGAN  
ANN ARBOR, MI 48109-2029

BAUR, JOSEPH A., PHD  
ASSISTANT PROFESSOR OF PHYSIOLOGY  
DEPARTMENT OF PHYSIOLOGY  
PERELMAN SCHOOL OF MEDICINE  
UNIVERSITY OF PENNSYLVANIA  
PHILADELPHIA, PA 19104

BERNARD, DANIEL J., PHD

PROFESSOR  
DEPARTMENT OF PHARMACOLOGY AND  
THERAPEUTICS  
MCGILL UNIVERSITY  
MONTREAL, QC H3G 1Y6  
CANADA

BLACKER, DEBORAH L., MD, SCD  
PROFESSOR  
DEPARTMENT OF PSYCHIATRY  
MASSACHUSETTS GENERAL HOSPITAL  
CHARLESTOWN, MA 02129-2000

BLAU, DAVID M., PHD  
PROFESSOR  
DEPARTMENT OF ECONOMICS  
THE OHIO STATE UNIVERSITY  
COLUMBUS, OH 43210

BOND, DALE S., PHD  
ASSOCIATE PROFESSOR  
WEIGHT CONTROL AND DIABETES  
RESEARCH CENTER  
THE MIRIAM HOSPITAL  
BROWN UNIVERSITY  
PROVIDENCE, RI 02903

BUCKNER, RANDY L., PHD  
PROFESSOR  
DEPARTMENT OF PSYCHOLOGY  
HARVARD UNIVERSITY  
CAMBRIDGE, MA 02138

BUNDORF, MARY KATE, PHD  
ASSOCIATE PROFESSOR  
DEPARTMENT OF HEALTH RESEARCH AND  
POLICY  
STANFORD UNIVERSITY SCHOOL OF  
MEDICINE  
STANFORD, CA 94305

BROWN-BORG, HOLLY M., PHD  
PROFESSOR  
DEPARTMENT OF BASIC SCIENCES  
SCHOOL OF MEDICINE AND HEALTH  
SCIENCES  
UNIVERSITY OF NORTH DAKOTA  
GRAND FORKS, ND 58203

CALOF, ANNE LEIGHTON, PHD  
PROFESSOR  
DEPARTMENT OF ANATOMY AND

NEUROBIOLOGY  
COLLEGE OF MEDICINE  
UNIVERSITY OF CALIFORNIA, IRVINE  
IRVINE, CA 92697

CHATTERJI, SOMNATH, MBBS, MD  
WORLD HEALTH ORGANIZATION  
HEALTH STATISTICS & INFORMATICS  
GENEVA, SWITZERLAND

CHEADLE, JACOB E., PHD  
ASSOCIATE PROFESSOR  
UNIVERSITY OF NEBRASKA LINCOLN  
LINCOLN, NE 68512

CHI, GUANGQING, PHD  
ASSOCIATE PROFESSOR  
DEPARTMENT OF AGRICULTURAL  
ECONOMICS, SOCIOLOGY AND EDUCATION  
PENNSYLVANIA STATE UNIVERSITY  
UNIVERSITY PARK, PA 16802

CHILDS, GWEN V., PHD  
PROFESSOR AND CHAIR  
DEPARTMENT OF NEUROBIOLOGY  
AND DEVELOPMENTAL SCIENCES  
UNIVERSITY OF ARKANSAS  
LITTLE ROCK, AR 72205

CIRRITO, JOHN R., PHD  
ASSOCIATE PROFESSOR  
DEPARTMENT OF NEUROLOGY  
WASHINGTON UNIVERSITY SCHOOL OF  
MEDICINE  
ST. LOUIS, MO 63110

CONNELLY, KAREN, PHD  
ASSISTANT PROFESSOR  
DEPARTMENT OF HUMAN GENETICS  
EMORY UNIVERSITY SCHOOL OF MEDICINE  
ATLANTA, GA 30322

CONOVER, CHERYL A., PHD  
PROFESSOR  
DEPARTMENT OF INTERNAL MEDICINE  
MAYO CLINIC COLLEGE OF MEDICINE  
ROCHESTER, MN 55905

CURRAN, SARA R., PHD  
ASSOCIATE PROFESSOR  
DANIEL J. EVANS SCHOOL OF PUBLIC  
AFFAIRS

UNIVERSITY OF WASHINGTON  
SEATTLE, WA 98195

DAVIS, MICHAEL S., DVM, PHD  
CHIEF OFFICER  
CENTER FOR VETERINARY HEALTH  
SCIENCES  
OKLAHOMA STATE UNIVERSITY  
STILLWATER, OK 74078

ELLIOTT, DAWN M., PHD  
PROFESSOR AND CHAIR  
DEPARTMENT OF BIOMEDICAL  
ENGINEERING  
UNIVERSITY OF DELAWARE  
NEWARK, DE 19716

FISCHER, WOLFGANG H., PHD  
SENIOR STAFF SCIENTIST  
THE CLAYTON FOUNDATION  
LABORATORIES FOR PEPTIDE BIOLOGY  
THE SALK INSTITUTE  
LA JOLLA, CA 92037

FERGUSON, SHAWN, PHD  
ASSISTANT PROFESSOR  
DEPARTMENT OF CELL BIOLOGY  
YALE UNIVERISTY SCHOOL OF MEDICINE  
NEW HAVEN, CT 06510

FRISINA, ROBERT D., PHD  
PROFESSOR AND BME DIRECTOR  
DEPARTMENT OF CHEMICAL  
AND BIOMEDICAL ENGINEERING  
UNIVERSITY OF SOUTH FLORIDA  
TAMPA, FL 33620

GIBSON, GARY J., PHD  
HEAD, SECTION OF CELL BIOLOGY  
BONE AND JOINT CENTER  
HENRY FORD HOSPITAL  
DETROIT, MI 48202

GOLDRING, MARY B., PHD  
PROFESSOR  
CELL AND DEVELOPMENTAL BIOLOGY  
WEILL CORNELL MEDICAL COLLEGE  
NEW YORK, NY 10021

GRANHOLM-BENTLEY, ANN-CHARLOTTE  
ESTHER, DDS, PHD  
PROFESSOR AND DIRECTOR

KNOEBEL CENTER FOR THE STUDY OF  
AGING  
UNIVERSITY OF DENVER  
DENVER, CO 80208

GUTMANN, MYRON P., PHD  
DIRECTOR AND PROFESSOR OF HISTORY  
UNIVERSITY OF COLORADO  
1440 15TH STREE5T  
BOULDER, CO 80309

HAMILTON, KARYN L., PHD  
PROFESSOR  
DEPARTMENT OF HEALTH AND EXERCISE  
SCIENCE  
COLORADO STATE UNIVERSITY  
FORT COLLINS, CO 80523

JAMES, BRYAN DAVID, PHD  
ASSISTANT PROFESSOR  
RUSH ALZHEIMER'S DISEASE CENTER  
CHICAGO, IL 60612

JASPER, HEINRICH, PHD  
PROFESSOR  
THE BUCK INSTITUTE FOR RESEARCH ON  
AGING  
NOVATO, CA 94945

JENNINGS, JULIA, PHD  
ASSISTANT PROFESSOR  
STATE UNIVERSITY OF NEW YORK AT  
ALBANY  
ALBANY, NY 12202

JOHNSON, DAVID K., PHD  
ASSOCIATE PROFESSOR  
DEPARTMENT OF PSYCHOLOGY  
UNIVERSITY OF KANSAS  
LAWRENCE, KS 66045

JOHNSON, MATTHEW WAYNE, PHD  
ASSOCIATE PROFESSOR  
DEPARTMENT OF PSYCHIATRY  
AND BEHAVIORAL SCIENCES  
JOHNS HOPKINS UNIVERSITY SCHOOL OF  
MEDICINE  
BALTIMORE, MD 21224

JONES, DAMON, PHD  
ASSISTANT PROFESSOR  
THE HARRIS SCHOOL OF PUBLIC POLICY  
STUDIES

UNIVERSITY OF CHICAGO  
CHICAGO, IL 60637

KAKAR, SHAM S., PHD  
PROFESSOR  
DEPARTMENT OF MEDICINE  
UNIVERSITY OF LOUISVILLE  
LOUISVILLE, KY 40202

KANG, DAVID E., PHD  
ASSOCIATE PROFESSOR  
DEPARTMENT OF MOLECULAR MEDICINE  
BYRD ALZHEIMER'S INSTITUTE  
UNIVERSITY OF SOUTH FLORIDA  
TAMPA, FL 33613

KASAKOFF, ALICE BEE, PHD  
DEPARTMENT OF ANTHROPOLOGY  
UNIVERSITY OF SOUTH CAROLINA AT  
COLUMBIA  
COLUMBIA, SC 29208

KAUWE, JOHN SAI KEONG, PHD  
ASSOCIATE PROFESSOR  
DEPARTMENTS OF BIOLOGY AND  
NEUROSCIENCE  
BRIGHAM YOUNG UNIVERSITY  
PROVO, UT 84602

KENNEDY, BRIAN K., PHD  
PRESIDENT, CEO AND PROFESSOR  
BUCK INSTITUTE FOR RESEARCH ON  
AGING  
NOVATO, CA 94945

KETCHAM, JONATHAN DAVID, PHD  
ASSOCIATE PROFESSOR  
W.P. CAREY SCHOOL OF BUSINESS  
DEPARTMENT OF MARKETING  
ARIZONA STATE UNIVERSITY  
TEMPE, AZ 85287

KITSIS, RICHARD N., MD  
PROFESSOR  
DORROS CHAIR IN CARDIOVASCULAR  
DISEASE  
DIRECTOR, WILF FAMILY  
CARDIOVASCULAR RESEARCH INSTITUTE  
ALBERT EINSTEIN COLLEGE OF MEDICINE  
BRONX, NY 10461

KOHLER, HANS-PETER, PHD

PROFESSOR  
DEPARTMENT OF SOCIOLOGY  
UNIVERSITY OF PENNSYLVANIA  
PHILADELPHIA, PA 19104

KONDRATOV, ROMAN V., PHD  
ASSOCIATE PROFESSOR  
DEPARTMENT OF BIOLOGICAL,  
GEOLOGICAL, AND ENVIRONMENTAL  
SCIENCES  
CLEVELAND STATE UNIVERSITY  
CLEVELAND, OH 44115

KRAMER, JOEL H., PSYD  
PROFESSOR  
DEPARTMENT OF NEUROLOGY  
UNIVERSITY OF CALIFORNIA, SAN  
FRANCISCO  
SAN FRANCISCO, CA 94158

KRYSCIO, RICHARD J., PHD  
PROFESSOR AND CHAIR  
DEPARTMENT OF STATISTICS AND  
BIostatISTICS  
UNIVERSITY OF KENTUCKY  
LEXINGTON, KY 40536

LA SPADA, ALBERT R., MD, PHD  
PROFESSOR  
DEPARTMENTS OF PEDIATRICS, CELLULAR  
AND MOLECULAR MEDICINE AND  
NEUROSCIENCES  
UNIVERSITY OF CALIFORNIA AT SAN  
DIEGO  
LA JOLLA, CA 92093

LEFLER, LEANNE L., PHD, BSN  
ASSOCIATE PROFESSOR  
DEPARTMENT OF NURSING  
COLLEGE OF NURSING  
UNIVERSITY OF ARKANSAS FOR MEDICAL  
SCIENCES  
LITTLE ROCK, AR 72205

LEGER, PIERRE  
ASSOCIATE PROFESSOR  
DIVISION OF HEALTH POLICY AND  
ADMINISTRATION  
SCHOOL OF PUBLIC HEALTH  
UNIVERSITY OF ILLINOIS AT CHICAGO  
CHICAGO, IL 60612

LOSASSO, ANTHONY T., PHD  
PROFESSOR AND SENIOR RESEARCH  
SCIENTIST  
HEALTH POLICY AND ADMINISTRATION  
UNIVERSITY OF ILLINOIS AT CHICAGO  
CHICAGO, IL 60612

MAO, ZIXU, MD, PHD  
PROFESSOR  
DEPARTMENT OF PHARMACOLOGY AND  
NEUROLOGY  
EMORY UNIVERSITY SCHOOL OF MEDICINE  
ATLANTA, GA 30322

MARTIN, GEORGE M., MD  
PROFESSOR  
DEPARTMENT OF PATHOLOGY  
UNIVERSITY OF WASHINGTON  
SEATTLE, WA 98195

MCCARTER, ROGER JOHN, PHD  
PROFESSOR  
DEPARTMENT OF PHYSIOLOGY  
UNIVERSITY OF TEXAS HEALTH  
SCIENCE CENTER  
SAN ANTONIO, TX 78284

MEDVENE, LOUIS J., PHD  
PROFESSOR  
DEPARTMENT OF PSYCHOLOGY  
WICHITA STATE UNIVERSITY  
WICHITA, KS 67260

MOODY, JAMES, PHD  
PROFESSOR  
DEPARTMENT OF SOCIOLOGY  
DUKE UNIVERSITY  
DURHAM, NC 27708

MURPHY, COLEEN TARA, PHD  
PROFESSOR  
DEPARTMENT OF MOLECULAR BIOLOGY  
AND GENOMICS  
PRINCETON UNIVERSITY  
PRINCETON, NJ 08544

NAVARATNAM, DHASAKUMAR S., MD, PHD  
ASSOCIATE PROFESSOR  
DEPARTMENT OF NEUROLOGY AND  
NEUROBIOLOGY  
YALE UNIVERSITY  
NEW HAVEN, CT 06510

NOSAL, KATHLEEN, PHD  
ASSISTANT PROFESSOR  
DEPARTMENT OF ECONOMICS  
UNIVERSITY OF MANNHEIM  
MANNHEIM 68161  
GERMANY

OLSEN, RANDALL J., PHD  
PROFESSOR  
DEPARTMENT OF ECONOMICS  
THE OHIO STATE UNIVERSITY  
COLUMBUS, OH 43221

PAGE, RODNEY LEE, DVM  
DIRECTOR  
DEPARTMENT OF CLINICAL SCIENCES  
COLORADO STATE UNIVERSITY  
DENVER, CO 80208

PETERS-LIBEU, CLARE A., PHD  
STAFF SCIENTIST  
BUCK INSTITUTE FOR RESEARCH ON  
AGING  
NOVATO, CA 94945

PEELLE, JONATHAN E., PHD  
ASSISTANT PROFESSOR  
WASHINGTON UNIVERSITY  
SAINT LUIS, MO 63110

SALVY, SARAH-JEANNE, PHD  
ASSOCIATE PROFESSOR  
CHAN DIVISION OF OCCUPATIONAL  
SCIENCE AND OCCUPATIONAL THERAPY  
UNIVERSITY OF SOUTHERN CALIFORNIA  
LOS ANGELES, CA 90089

SCHAFFER, DAVID V., PHD  
PROFESSOR  
DEPARTMENT OF CHEMICAL ENGINEERING  
UNIVERSITY OF CALIFORNIA, BERKELEY  
BERKELEY, CA 94720

SCHNEIDER, JULIE A., MD  
PROFESSOR AND ASSOCIATE DIRECTOR  
DEPARTMENT OF PATHOLOGY  
RUSH ALZHEIMER'S DISEASE CENTER  
RUSH UNIVERSITY MEDICAL CENTER  
CHICAGO, IL 60612

SELL, CHRISTIAN, PHD

ASSOCIATE PROFESSOR  
DEPARTMENT OF PATHOLOGY  
COLLEGE OF MEDICINE  
DREXEL UNIVERSITY  
PHILADELPHIA, PA 19102

SHELIN, YVETTE I., MD  
PROFESSOR AND DIRECTOR  
DEPARTMENT OF PSYCHIATRY  
CENTER FOR THE NEUROMODULATION IN  
DEPRESSION AND STRESS  
UNIVERSITY OF PENNSYLVANIA SCHOOL  
OF MEDICINE  
PHILADELPHIA, PA 19104

SIMMONS, DWAYNE D., PHD  
PROFESSOR AND DIRECTOR OF  
MARC/BRIDGES  
DEPARTMENT OF INTEGRATIVE BIOLOGY  
AND PHYSIOLOGY  
UNIVERSITY OF CALIFORNIA, LOS  
ANGELES  
LOS ANGELES, CA 90095

SUBRAMANIAN, SUJHA, PHD  
SENIOR HEALTH ECONOMIST  
DIVISION OF HEALTH ECONOMICS  
RESEARCH  
RESEARCH TRIANGLE INSTITUTE  
WALTHAM, MA 02452-8414

STAFFORD, FRANK PETER, PHD  
PROFESSOR OF ECONOMICS  
DEPARTMENT OF ECONOMICS  
UNIVERSITY OF MICHIGAN  
ANN ARBOR, MI 48106

SWARTZ, ANN M., PHD  
PROFESSOR AND CHAIR  
DEPARTMENT OF KINESIOLOGY  
EXERCISE SCIENCE & HEALTH  
PROMOTION  
COLLEGE OF HEALTH SCIENCES  
UNIVERSITY OF WISCONSIN-MILWAUKEE  
MILWAUKEE, WI 53201-0413

TEMPLE, SALLY, PHD  
PROFESSOR  
NEW YORK NEURAL STEM INSTITUTE  
RENSSELAER, NY 12144

THOMPSON, WINSTON E., PHD

PROFESSOR  
DEPARTMENT OF PHYSIOLOGY  
MOREHOUSE SCHOOL OF MEDICINE  
ATLANTA, GA 30310

THYFAULT, JOHN P., PHD  
ASSOCIATE PROFESSOR  
DEPARTMENT OF MOLECULAR  
INTEGRATIVE PHYSIOLOGY  
UNIVERSITY OF KANSAS MEDICAL CENTER  
KANSAS CITY, KS 66160

TRAVISON, THOMAS GLENN, PHD  
SENIOR SCIENTIST AND DIRECTOR  
INSTITUTE FOR AGING RESEARCH  
DIVISION OF GERONTOLOGY  
HARVARD MEDICAL SCHOOL  
BOSTON, MA 02131

TRUSHINA, EUGENIA, PHD  
ASSOCIATE PROFESSOR  
DEPARTMENT OF NEUROLOGY AND  
PHARMACOLOGY  
MAYO CLINIC COLLEGE OF MEDICINE  
ROCHESTER, MN 55905

VARELA, MAURICIO, PHD  
ASSISTANT PROFESSOR  
DEPARTMENT OF ECONOMICS  
UNIVERSITY OF ARIZONA  
TUCSON, AZ 85721

VILLEDA, SAUL A., PHD  
ASSISTANT PROFESSOR  
UNIVERSITY OF CALIFORNIA SAN  
FRANCISCO  
SAN FRANCISCO, CA 94143

WAIDMANN, TIMOTHY A., PHD  
SENIOR RESEARCH ASSOCIATE  
HEALTH POLICY CENTER  
URBAN INSTITUTE  
WASHINGTON, DC 20037

WALKER, WILLIAM H., PHD  
ASSOCIATE PROFESSOR  
DEPARTMENT OF CELL BIOLOGY AND  
PHYSIOLOGY  
UNIVERSITY OF PITTSBURGH  
PITTSBURGH, PA 15261

WANG, HONGMEI, PHD

UNIVERSITY OF NEBRASKA MEDICAL  
CENTER  
OMAHA, NE 68198

WELSH-BOHMER, KATHLEEN ANNE, PHD  
PROFESSOR AND DIRECTOR  
DEPARTMENTS OF PSYCHOLOGY AND  
NEUROLOGY  
ALZHEIMER'S DISEASE CENTER  
DUKE UNIVERSITY  
DURHAM, NC 27705

WEINSTEIN, MAXINE A., PHD  
DISTINGUISHED PROFESSOR  
GRADUATE SCHOOL OF ARTS AND  
SCIENCES  
CENTER FOR POPULATION AND HEALTH  
GEORGETOWN UNIVERSITY  
WASHINGTON, DC 20057

WESTENDORF, JENNIFER J., PHD  
MARGARET AMINI PROFESSOR  
DEPARTMENT OF ORTHOPEDICS,  
BIOCHEMISTRY AND MOLECULAR BIOLOGY  
MAYO CLINIC  
ROCHESTER, MN 55905

WILKER, ELISSA, SCD  
ASSISTANT PROFESSOR OF MEDICINE  
DEPARTMENT OF MEDICINE AND  
EPEDEMIOLOGY  
HARVARD MEDICAL SCHOOL  
BOSTON, MA 02215

WINGFIELD, ARTHUR, PHD  
PROFESSOR  
DEPARTMENT OF PSYCHOLOGY AND  
NEUROSCIENCE  
DIRECTOR, VOLLEN NATIONAL CENTER  
FOR COMPLEX SYSTEMS  
BRANDEIS UNIVERSITY  
WALTHAM, MA 02454

YUE, ZHENYU, PHD  
PROFESSOR  
DEPARTMENT OF NEUROLOGY AND  
NEUROSCIENCE  
ICAHN SCHOOL OF MEDICINE AT MOUNT  
SINAI  
NEW YORK, NY 10029

ZAGHENI, EMILIO, PHD

ASSISTANT PROFESSOR  
DEPARTMENT OF SOCIOLOGY  
UNIVERSITY OF WASHINGTON  
SEATTLE, WA 98195

ZHANG, MIN, PHD, MD  
ASSOCIATE PROFESSOR  
DEPARTMENT OF STATISTICS  
PURDUE UNIVERSITY  
WEST LAFAYETTE, IN 47907

ZHANG, QI, PHD  
ASSISTANT PROFESSOR  
DEPARTMENT OF PHARMACOLOGY  
VANDERBILT UNIVERSITY MEDICAL  
CENTER  
NASHVILLE, TN 37232

ZHENG, HUI, PHD  
PROFESSOR AND DIRECTOR  
HUFFINGTON CENTER ON AGING  
BAYLOR COLLEGE OF MEDICINE  
HOUSTON, TX 77030

**SCIENTIFIC REVIEW OFFICER**

BISSONETTE, GREG, PHD  
SCIENTIFIC REVIEW BRANCH  
NATIONAL INSTITUTE ON AGING  
NATIONAL INSTITUTES OF HEALTH  
BETHESDA, MD 20892

FIRTH, KIMBERLY, PHD  
SCIENTIFIC REVIEW BRANCH  
NATIONAL INSTITUTE ON AGING  
NATIONAL INSTITUTES OF HEALTH  
BETHESDA, MD 20892

GRIMALDI, MAURIZIO, MD, PHD  
SCIENTIFIC REVIEW OFFICER  
NATIONAL INSTITUTE ON AGING  
NATIONAL INSTITUTES OF HEALTH  
BETHESDA, MD 20892

MARKOWSKA, ALICJA L., PHD, DSC  
SCIENTIFIC REVIEW BRANCH  
NATIONAL INSTITUTE ON AGING  
NATIONAL INSTITUTES OF HEALTH  
BETHESDA, MD 20982

MIKHAIL, ISIS S., MD, MPH, DRPH  
SCIENTIFIC REVIEW BRANCH

NATIONAL INSTITUTE ON AGING  
NATIONAL INSTITUTES OF HEALTH  
BETHESDA, MD 20892

MOTEN, CARMEN, PHD, MPH  
SCIENTIFIC REVIEW BRANCH  
NATIONAL INSTITUTE ON AGING  
NATIONAL INSTITUTES OF HEALTH  
BETHESDA, MD 20892

NAKHAI, BITA, PHD  
SCIENTIFIC REVIEW BRANCH  
NATIONAL INSTITUTE ON AGING  
NATIONAL INSTITUTES OF HEALTH  
BETHESDA, MD 20814

PARSADANIAN, ALEXANDER, PHD  
SCIENTIFIC REVIEW OFFICER  
SCIENTIFIC REVIEW BRANCH  
NATIONAL INSTITUTE ON AGING  
NATIONAL INSTITUTES OF HEALTH  
BETHESDA, MD 20892

PRASAD, NIJAGUNA, MS, PHD  
SCIENTIFIC REVIEW OFFICER  
SCIENTIFIC REVIEW BRANCH  
NATIONAL INSTITUTE ON AGING  
NATIONAL INSTITUTES OF HEALTH  
BETHESDA, MD 20892

**EXTRAMURAL SUPPORT ASSISTANT**

GLENN, JENNIFER N  
EXTRAMURAL SUPPORT ASSISTANT  
SCIENTIFIC REVIEW BRANCH  
NATIONAL INSTITUTE ON AGING  
NATIONAL INSTITUTES OF HEALTH  
BETHESDA, MD 20894

WILSON, SHAYLA K  
EXTRAMURAL SUPPORT ASSISTANT  
SCIENTIFIC REVIEW BRANCH  
NATIONAL INSTITUTE ON AGING  
NATIONAL INSTITUTE OF HEALTH  
BETHESDA, MD 20892

WOODEN, EZELLE III  
EXTRAMURAL SUPPORT ASSISTANT  
SCIENTIFIC REVIEW BRANCH  
NATIONAL INSTITUTE ON AGING  
NATIONAL INSTITUTES OF HEALTH  
BETHESDA, MD 20892

**PROGRAM REPRESENTATIVE**

BHATTACHARYYA, PARTHA, PHD  
PROGRAM DIRECTOR  
DIVISION OF BEHAVIORAL AND SOCIAL  
RESEARCH  
NATIONAL INSTITUTE ON AGING  
NATIONAL INSTITUTES OF HEALTH  
BETHESDA, MD 20892

FRIDELL, YIH-WOEI  
DIVISION OF AGING BIOLOGY  
NATIONAL INSTITUTE ON AGING  
NATIONAL INSTITUTES OF HEALTH  
BETHESDA, MD 20892

FULDNER, REBECCA A., PHD  
HEALTH SCIENCE ADMINISTRATOR  
BIOLOGY OF AGING PROGRAM  
NATIONAL INSTITUTE ON AGING  
BETHESDA, MD 20814

HSIAO, JOHN, MD  
HEALTH SCIENTIST ADMINISTRATOR  
DIVISION OF NEUROSCIENCE  
NATIONAL INSTITUTE ON AGING  
NATIONAL INSTITUTES OF HEALTH  
BETHESDA, MD 20892

JOSEPH, LYNDON J O, PHD  
ROMASHKAN, SERGEI, MD, PHD  
BRANCH CHIEF  
HEALTH SCIENTIST ADMINISTRATOR  
GERIATRICS AND CLINICAL  
GERONTOLOGY  
NATIONAL INSTITUTE ON AGING  
NATIONAL INSTITUTES OF HEALTH  
BETHESDA, MD 20892

KOHANSKI, RONALD A., PHD  
DEPUTY DIRECTOR  
BIOLOGY OF AGING PROGRAM  
NATIONAL INSTITUTE ON AGING  
BETHESDA, MD 20814

PATMIOS, GEORGEANNE E.,  
PROGRAM OFFICER  
DIVISION OF BEHAVIORAL AND SOCIAL  
RESEARCH  
NATIONAL INSTITUTE ON AGING  
NATIONAL INSTITUTES OF HEALTH

BETHESDA, MD 20892

ROMASHKAN, SERGEI, MD, PHD  
BRANCH CHIEF  
HEALTH SCIENCE ADMINISTRATOR  
DIVISION OF GERIATRICS AND CLINICAL  
GERONTOLOGY  
NATIONAL INSTITUTE ON AGING  
NATIONAL INSTITUTES OF HEALTH  
BETHESDA, MD 20893

WILLIAMS, JOHN PHILIP, PHD  
HEALTH SCIENCE ADMINISTRATOR  
NATIONAL INSTITUTE OF HEALTH  
NATIONAL INSTITUTE OF AGING  
DIVISION OF AGING BIOLOGY  
BETHESDA, MD 20892

WISE, BRADLEY C., PHD  
CHIEF, HEALTH SCIENTIST  
ADMINISTRATOR  
DIVISION OF NEUROSCIENCE  
NATIONAL INSTITUTE ON AGING  
NATIONAL INSTITUTES OF HEALTH  
BETHESDA, MD 20892

YANG, AUSTIN JYAN-YU  
HEALTH SCIENTIST ADMINISTRATOR  
DIVISION OF NEUROSCIENCE  
NATIONAL INSTITUTE ON AGING  
BETHESDA, MD 20892

---

Footnotes for 1 P01 AG052352-01A1; PI Name: LACROIX, ANDREA Z.

NIH has modified its policy regarding the receipt of resubmissions (amended applications). See Guide Notice NOT-OD-14-074 at <http://grants.nih.gov/grants/guide/notice-files/NOT-OD-14-074.html>. The impact/priority score is calculated after discussion of an application by averaging the overall scores (1-9) given by all voting reviewers on the committee and multiplying by 10. The criterion scores are submitted prior to the meeting by the individual reviewers assigned to an application, and are not discussed specifically at the review meeting or calculated into the overall impact score. Some applications also receive a percentile ranking. For details on the review process, see [http://grants.nih.gov/grants/peer\\_review\\_process.htm#scoring](http://grants.nih.gov/grants/peer_review_process.htm#scoring).

MEETING ROSTER  
National Institute on Aging Special Emphasis Panel

NATIONAL INSTITUTE ON AGING  
Second Stage P01 Review  
ZAG1 ZIJ-7 (J1)  
11/21/2016

CHAIRPERSON(S)

MELTZER, DAVID O, MD, PHD  
PROFESSOR  
DEPARTMENT OF MEDICINE  
CHIEF, SECTION OF HOSPITAL MEDICINE  
DIRECTOR, CENTER FOR HEALTH AND THE SOCIAL SCS.  
UNIVERSITY OF CHICAGO  
CHICAGO, IL 60637

MEMBERS

BICKFORD, PAULA C, PHD  
DISTINGUISHED USF HEALTH PROFESSOR  
DEPARTMENT OF NEUROSURGERY  
AND BRAIN REPAIR  
USF MORSANI COM  
MDC-78  
TAMPA, FL 33612

CAMPISI, JUDITH, PHD  
PROFESSOR  
BUCK INSTITUTE FOR AGE RESEARCH  
LABORATORY OF CELLULAR AND  
MOLECULAR BIOLOGY OF AGING  
NOVATO, CA 94945

CARSTENSEN, LAURA L, PHD  
PROFESSOR  
THE FAIRLEIGH S. DICKINSON JR. PROFESSOR IN  
PUBLIC POLICY  
DIRECTOR, STANFORD CENTER ON LONGEVITY  
STANFORD UNIVERSITY  
STANFORD, CA 94305

DE LEON, MONY J., EDD  
PROFESSOR OF PSYCHIATRY  
DEPARTMENT OF PSYCHIATRY  
SCHOOL OF MEDICINE  
NEW YORK UNIVERSITY  
NEW YORK, NY 10016

KRITCHEVSKY, STEPHEN B., PHD  
DIRECTOR  
STRICHT CENTER ON AGING  
DEPARTMENT OF INTERNAL MEDICINE  
WAKE FOREST UNIVERSITY  
WINSTON-SALEM, NC 27157

KUCHEL, GEORGE A, MD  
DIRECTOR, UCONN CENTER ON AGING  
DEPARTMENT OF MEDICINE  
CENTER OF AGING  
UNIVERSITY OF CONNECTICUT HEALTH CENTER  
FARMINGTON, CT 06030

RICHARDSON, ARLAN G., PHD  
PROFESSOR  
UNIVERSITY OF OKLAHOMA  
ROCA/GERIATRIC MEDICINE  
OKLAHOMA CITY, OK 73104

ROSENE, DOUGLAS L, PHD  
PROFESSOR  
DEPARTMENT OF ANATOMY AND NEUROBIOLOGY  
BOSTON UNIVERSITY SCHOOL OF MEDICINE  
BOSTON, MA 02118

SIEBER, FREDERICK E, MD  
PROFESSOR  
DEPARTMENT OF ANESTHESIOLOGY/  
CRITICAL CARE MEDICINE  
JOHNS HOPKINS UNIVERSITY  
BALTIMORE, MD 21224

SMITH, JAMES PATRICK, PHD  
NEPHROLOGIST AND MEDICAL OFFICER  
RAND CORPORATION  
DEPT OF LABOR AND POPULATION  
SANTA MONICA, CA 90407-2138

VAN ELDIK, LINDA J, PHD  
PROFESSOR AND DIRECTOR  
SANDERS-BROWN CENTER ON AGING  
UNIVERSITY OF KENTUCKY  
LEXINGTON, KY 40536

SCIENTIFIC REVIEW OFFICER

VEMURI, RAMESH, PHD  
CHIEF, SCIENTIFIC REVIEW BRANCH  
NATIONAL INSTITUTE ON AGING  
NATIONAL INSTITUTES OF HEALTH  
BETHESDA, MD 20892

EXTRAMURAL SUPPORT ASSISTANT

WILSON, SHAYLA K  
EXTRAMURAL SUPPORT ASSISTANT  
NATIONAL INSTITUTE ON AGING  
NATIONAL INSTITUTE OF HEALTH  
BETHESDA, MD 20892

Consultants are required to absent themselves from the room during the review of any application if their presence would constitute or appear to constitute a conflict of interest.
